# Supplementary material for: Allicin attenuates silica-induced pulmonary fibrosis via Serpinb2/NF-Kappa B pathway
Source: Research Square preprint supplement (doi:10.21203/rs.3.rs-6818888/v1), 2025-06-09
Supplement: Supplementary file 1 [file fc9fe323a9781584d3dbd897.docx]

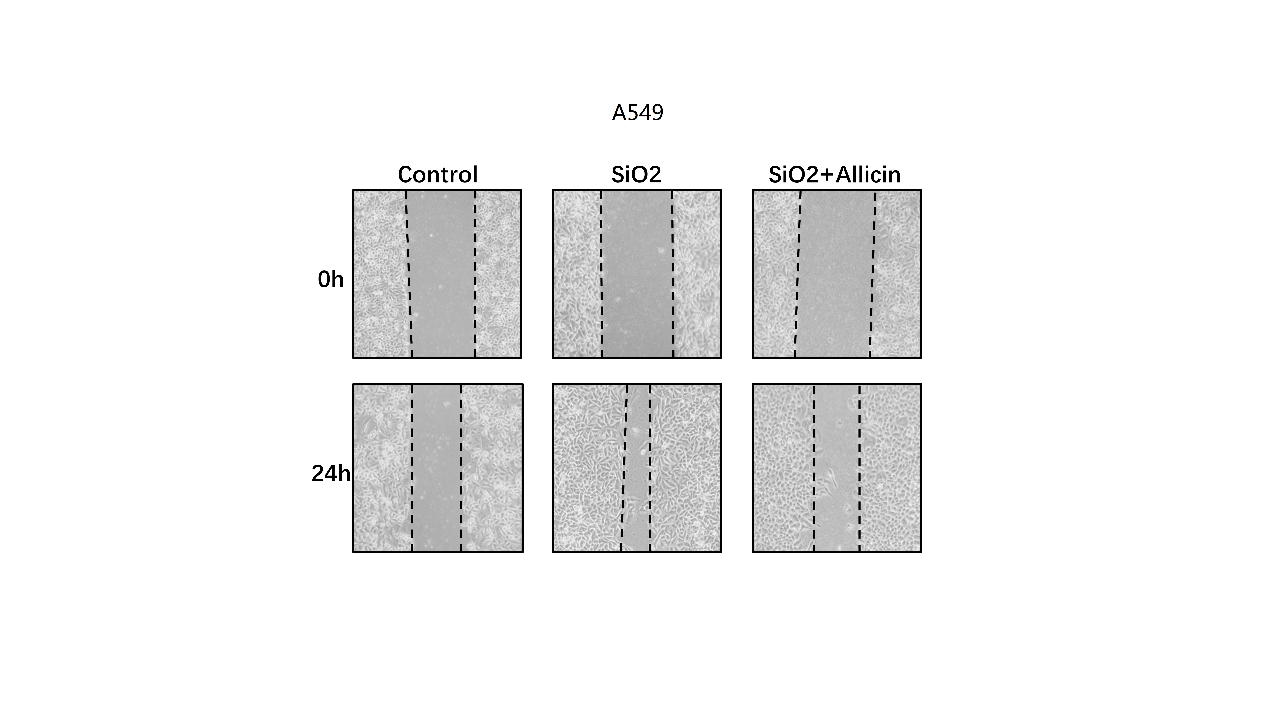


**FigureS1A** Cell scratch assay of A549.

The results showed that the migration of the silica group was significantly enhanced after 24h, which was inhibited by the addition of allicin
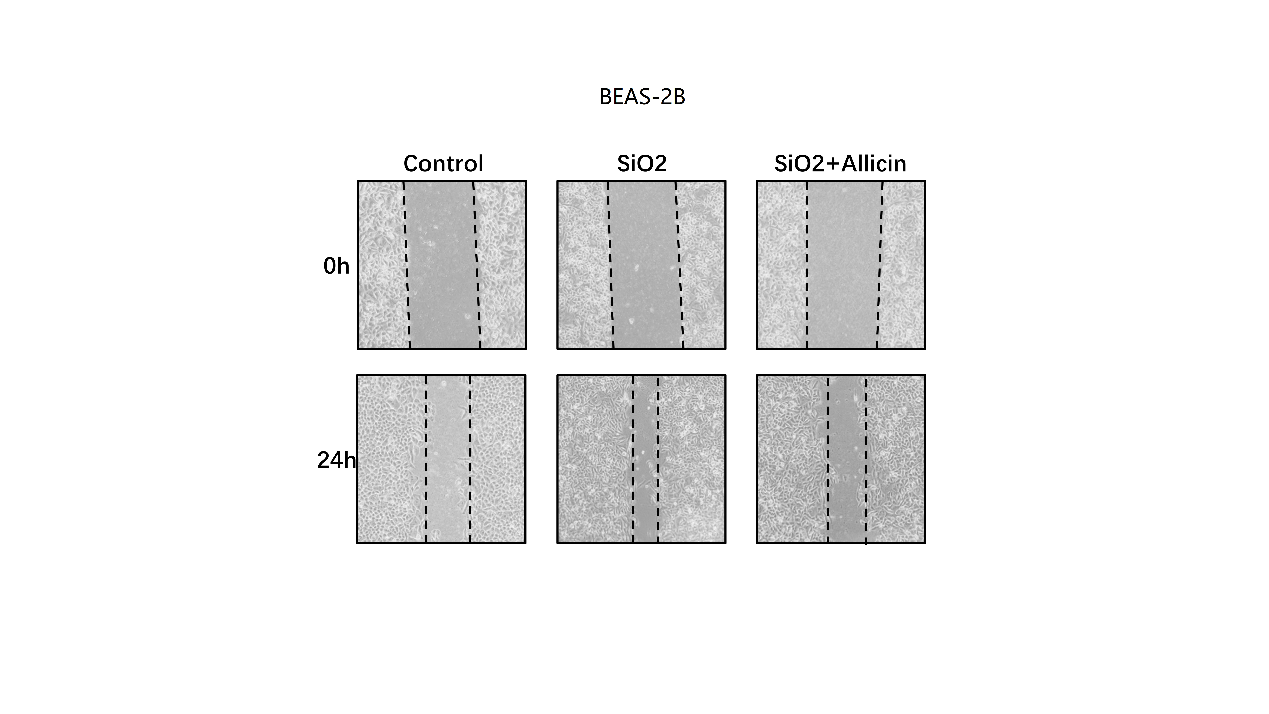


**FigureS1B** Cell scratch assay of BEAS-2B.

The results showed that the migration of the silica group was significantly enhanced after 24h, which was inhibited by the addition of allicin
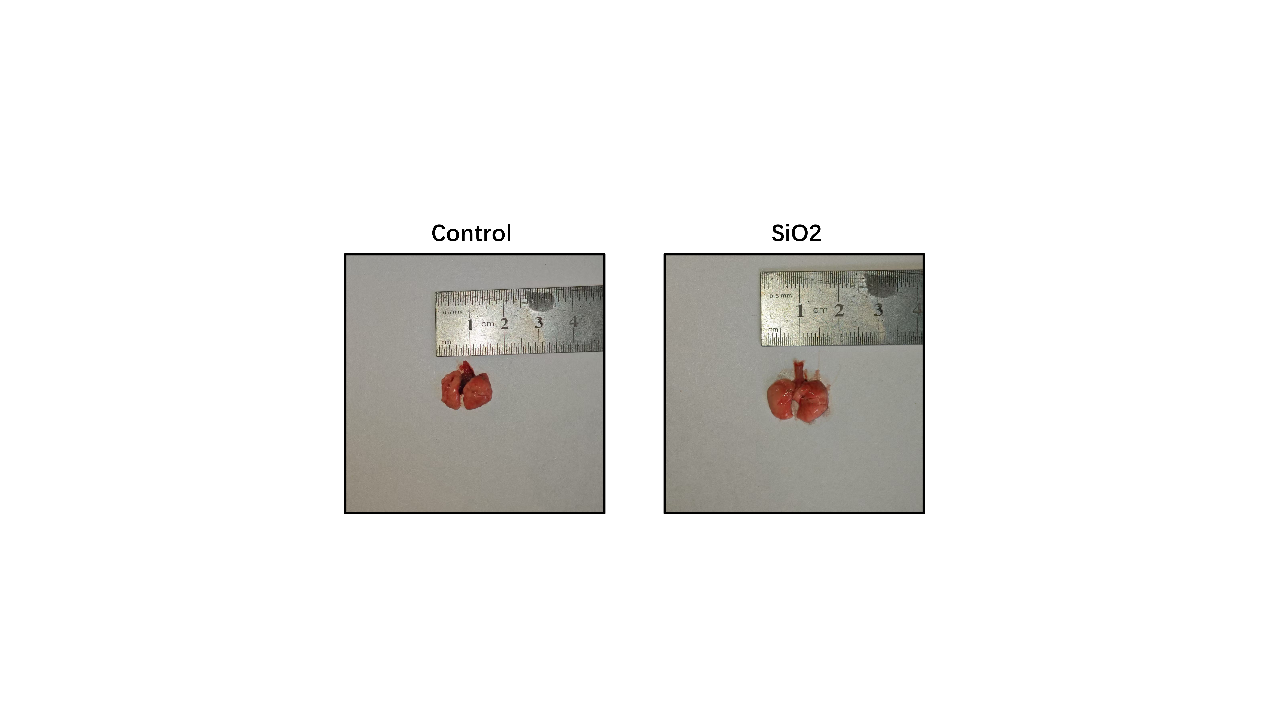


**FigureS2A** Lung tissue of mice in silica model group and control group.

The results showed that the color of the silica model group was white and dim compared with the control group, indicating that the model was more successful
